# Supplementary material for: Precision control of molecular weight ratios in fully conjugated block copolymers using flow synthesis
Source: Royal Society of Chemistry journal article supplement (doi:10.1039/d3py01333b), 2024-01-01
Supplement: d3py01333b1.pdf [file d3py01333b1.pdf]

## Supporting Information

# Precision Control of Molecular Weight Ratios in Fully Conjugated Block Copolymers Using Flow Synthesis

Seungjun Lee <sup>a</sup>, Gyung-Tack Kim <sup>a</sup>, Jueun Kim <sup>b</sup>, Taehoon Kang <sup>a</sup>, Taeshik Earmme <sup>b</sup> and Ye-Jin Hwang <sup>\*a</sup>

<sup>a</sup> Department of Chemistry and Chemical Engineering, Education and Research Center for Smart Energy and Materials, Inha University, 100 Inha-ro, Michuhol-gu, Incheon, Republic of Korea

<sup>b</sup> Department of Chemical Engineering, Hongik University, 94 Wausan-ro, Mapo-gu, Seoul 04066, Republic of Korea

Email: [yjhwang@inha.ac.kr](mailto:yjhwang@inha.ac.kr)

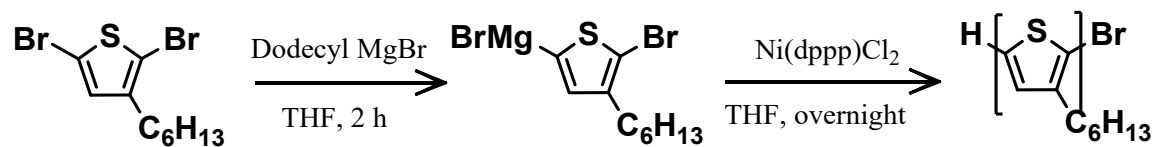

Scheme S1. Synthetic route of monobrominated P3HT. (P3HT-Br)

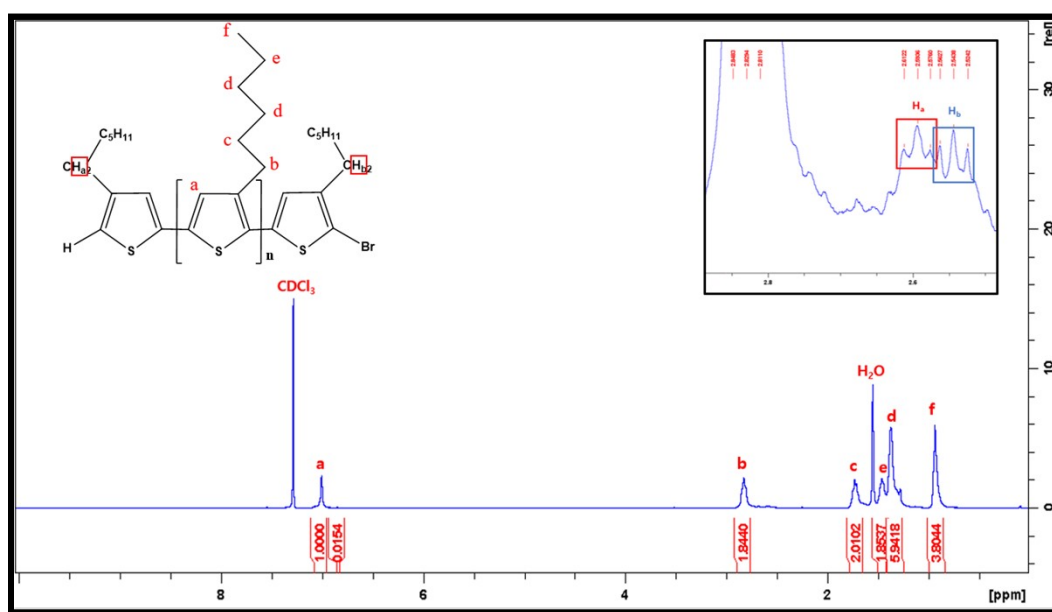

Fig. S1. <sup>1</sup>H NMR spectrum of P3HT-Br.

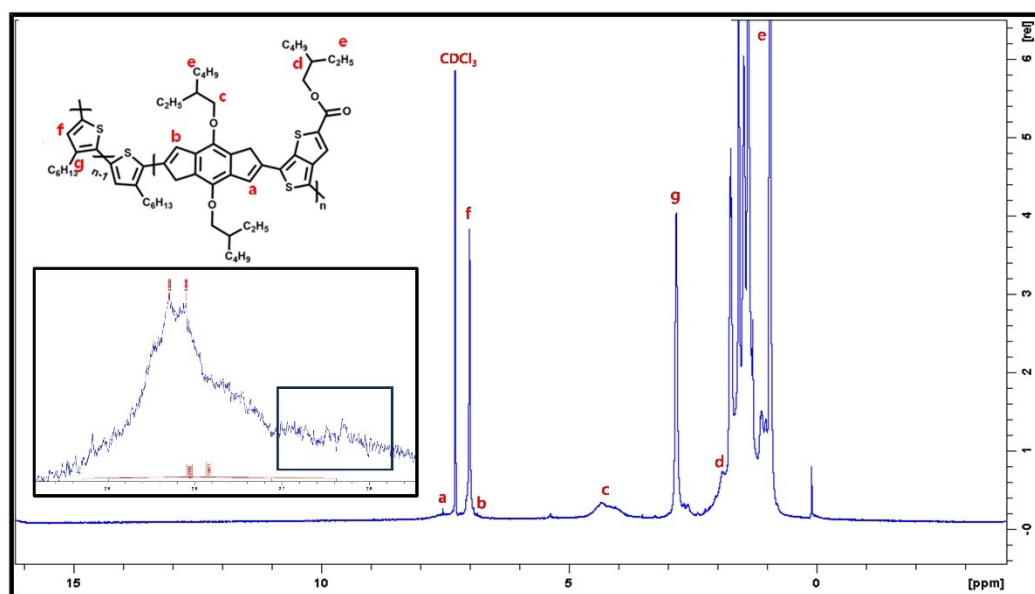

Fig. S2. <sup>1</sup>H NMR spectrum of P3HT-*b*-PTB7.

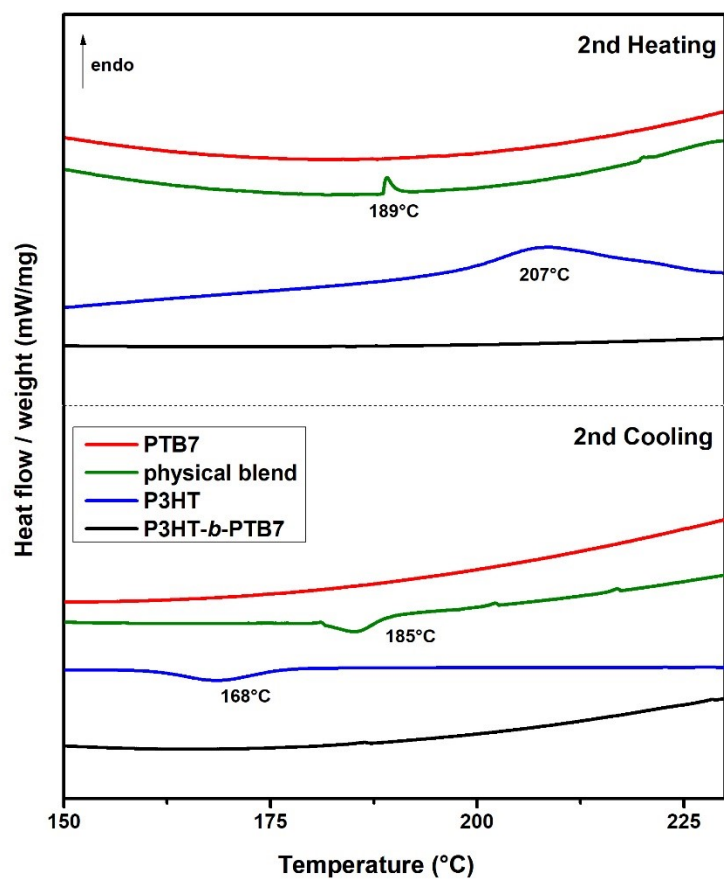

**Fig. S3.** The differential scanning calorimetry (DSC) graphs of P3HT, PTB7, P3HT-*b*-PTB7, and physical blend (P3HT:PTB7, 30:70) with heating/cooling rate of 10 °C min<sup>-1</sup> under nitrogen atmosphere.

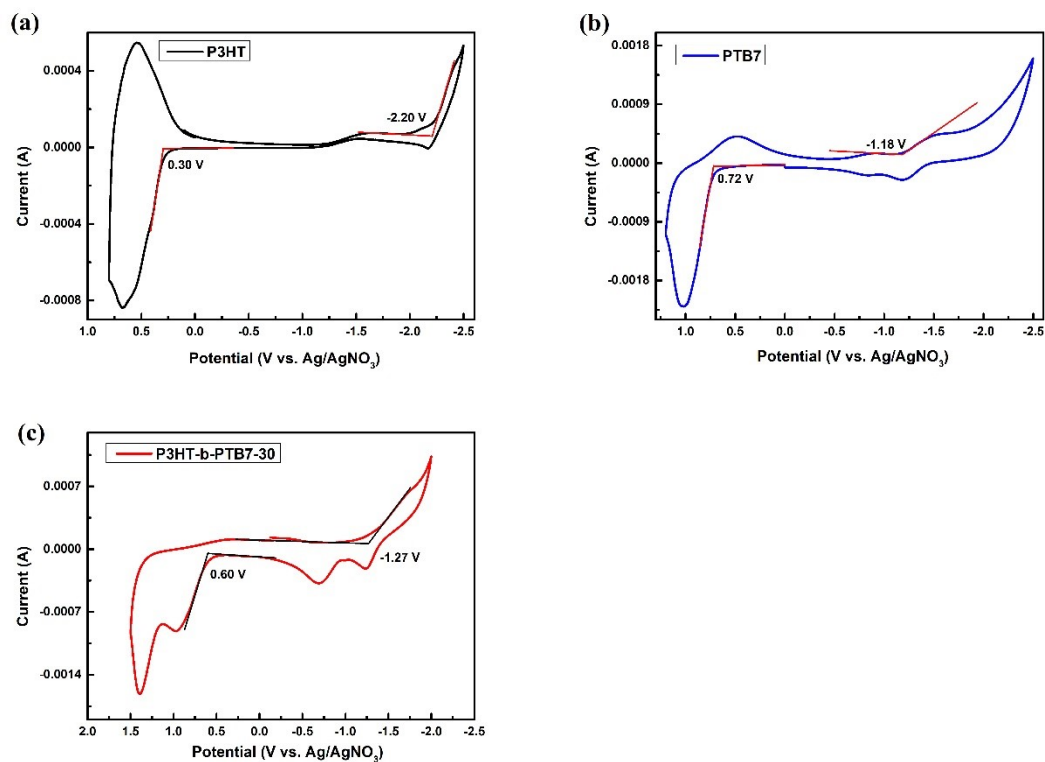

**Fig. S4.** Cyclic voltammogram of (a) P3HT, (b) PTB7, (c) P3HT-*b*-PTB7-30.

**Table S1.** Optical and electrochemical properties of P3HT, PTB7, and P3HT-*b*-PTB7-30.

|                              | $E_{\text{ox}}^a$ (eV) | $E_{\text{red}}^a$ (eV) | LUMO <sup>b</sup> (eV) | HOMO <sup>c</sup> (eV) |
|------------------------------|------------------------|-------------------------|------------------------|------------------------|
| <b>P3HT</b>                  | 0.30                   | -2.20                   | -2.49                  | -4.99                  |
| <b>PTB7</b>                  | 0.72                   | -1.18                   | -3.51                  | -5.41                  |
| <b>P3HT-<i>b</i>-PTB7-30</b> | 0.60                   | -1.27                   | -3.42                  | -5.29                  |

<sup>a</sup> Obtained from onset potentials in the cyclic voltammogram. <sup>b</sup> LUMO =  $-4.8 - (E_{\text{red}} - E_{1/2}^{\text{Fc}/\text{Fc}^+})$ .

<sup>c</sup> HOMO =  $-4.8 - (E_{\text{ox}} - E_{1/2}^{\text{Fc}/\text{Fc}^+})$

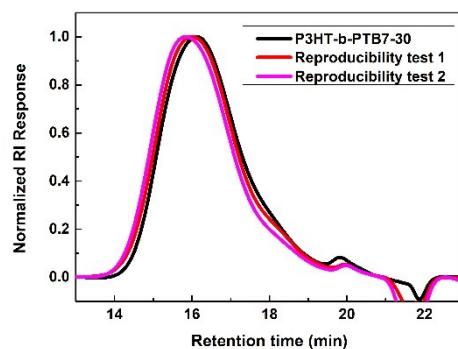

**Fig. S5.** Normalized GPC graph of three independent experiment for P3HT-*b*-PTB7-30.

**Table S2.** Molecular weight and dispersity of P3HT-*b*-PTB7-30 and products of reproducibility tests.

| polymer                 | $M_n$ (kDa) | $M_w$ (kDa) | $\bar{D}$ |
|-------------------------|-------------|-------------|-----------|
| P3HT- <i>b</i> -PTB7-30 | 27.9        | 64.0        | 2.30      |
| Reproducibility test 1  | 28.0        | 74.7        | 2.67      |
| Reproducibility test 2  | 29.2        | 79.7        | 2.73      |

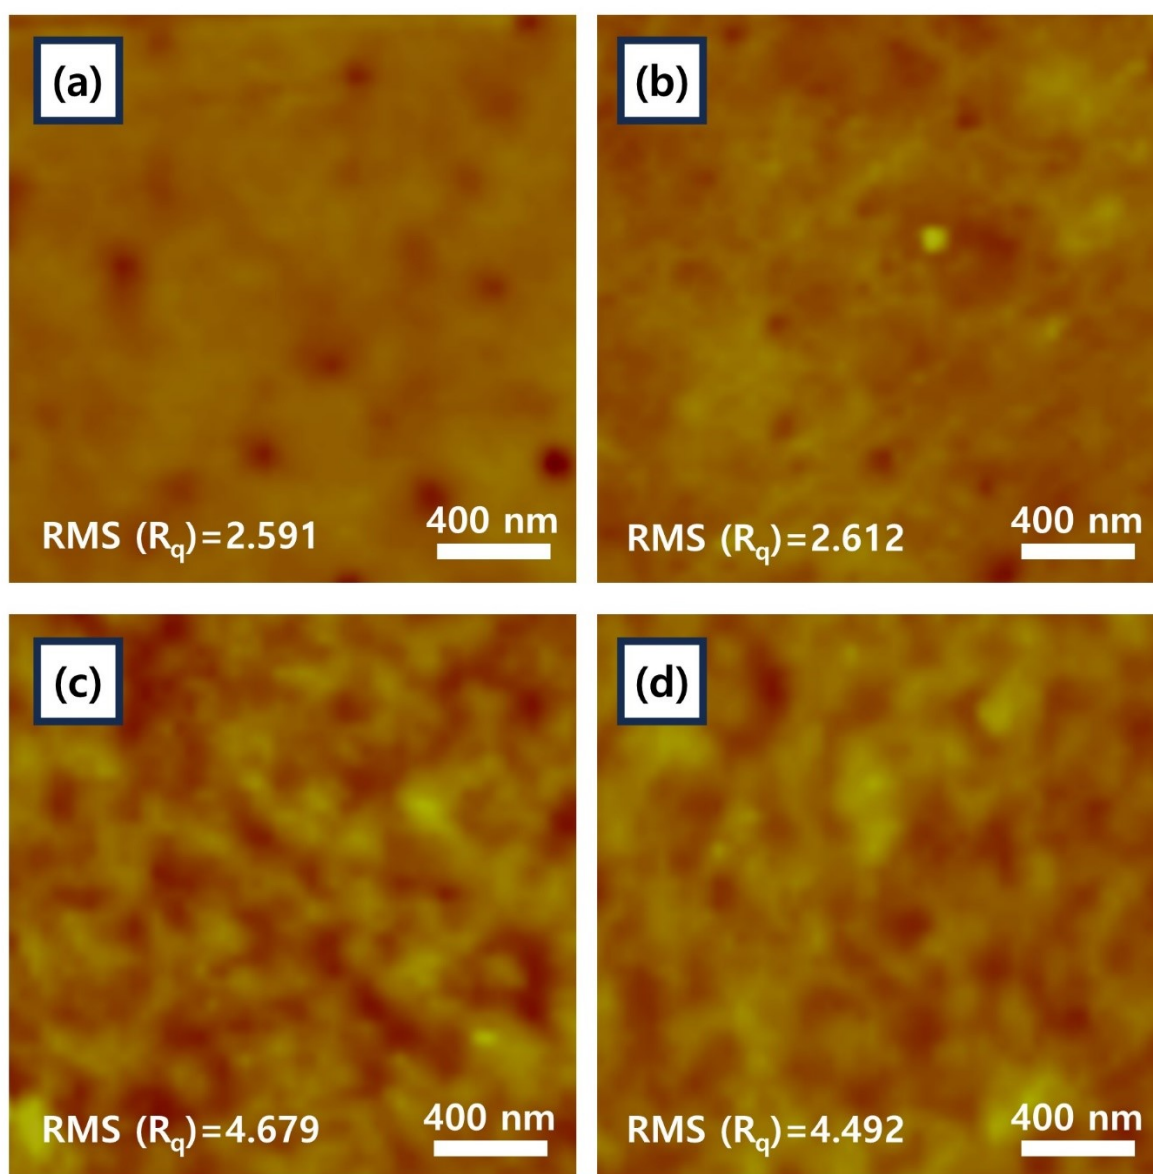

**Fig. S6.** AFM topography images ( $2\ \mu\text{m} \times 2\ \mu\text{m}$ ) and calculated route mean square roughness ( $R_q$ ) of fabricated OSC devices. (a) P1:PC<sub>71</sub>BM, (b) P2:PC<sub>71</sub>BM, (c) P3HT/PTB7:PC<sub>71</sub>BM and (d) PTB7:PC<sub>71</sub>BM
